# Supplementary material for: Area Deprivation Index and Rurality in Relation to Lung Cancer Prevalence and Mortality in a Rural State
Source: PubMed Central journal article supplement (PMC7353952; doi:10.1093/jncics/pkaa011), 2020-03-07
Supplement: pkaa011_supplementary_data.pdf [file pkaa011_supplementary_data.pdf]

## Supplementary Table 1

### ICD10 Diagnosis Codes and Description

|        |   |        |                                                              |
|--------|---|--------|--------------------------------------------------------------|
| C34.00 | - | C34.02 | Malignant neoplasm of main bronchus                          |
| C34.10 | - | C34.12 | Malignant neoplasm of upper lobe, bronchus or lung           |
| C34.2  |   |        | Malignant neoplasm of middle lobe, bronchus or lung          |
| C34.30 | - | C34.32 | Malignant neoplasm of lower lobe, bronchus or lung           |
| C34.80 | - | C34.82 | Malignant neoplasm of overlapping sites of bronchus and lung |
| C34.90 | - | C34.92 | Malignant neoplasm of unspecified part of bronchus or lung   |

### ICD9 Diagnosis Codes and Description

|       |                                      |
|-------|--------------------------------------|
| 162.0 | Malignant neoplasm trachea           |
| 162.2 | Malignant neoplasm main bronchus     |
| 162.3 | Malignant neoplasm upper lobe lung   |
| 162.4 | Malignant neoplasm middle lobe lung  |
| 162.5 | Malignant neoplasm lower lobe lung   |
| 162.8 | Malignant neoplasm bronchus/lung NEC |
| 162.9 | Malignant neoplasm bronchus/lung NOS |
